# Supplementary material for: Integration of In Silico and In Vitro Analysis of Gliotoxin Production Reveals a Narrow Range of Producing Fungal Species
Source: MDPI journal article supplement (doi:10.3390/jof8040361), 2022-03-31
Supplement: s1 [file s1]

|                                               | GliZ (transcription factor) |              |       |                |           |          |                     |
|-----------------------------------------------|-----------------------------|--------------|-------|----------------|-----------|----------|---------------------|
|                                               | Locus tag                   | Accession    | Score | Query Coverage | E value   | Identity |                     |
| <i>Aspergillus fumigatus</i> Af293            | AFUA_6G09630                | XP_750852    | 981   | 100%           | 0.0       | 100.00%  |                     |
| <i>Aspergillus fumigatus</i> A1163            | AFUB_075680                 | EDP49538     | 979   | 100%           | 0.0       | 99.80%   |                     |
| <i>Aspergillus fischerii</i> NRRL 181         | NFIA_055320                 | XP_001258080 | 679   | 100%           | 0.0       | 77.39%   |                     |
| <i>Aspergillus lentulus</i> IFM 54703         | ALT_0512                    | GAQ03191     | 661   | 100%           | 0.0       | 76.36%   |                     |
| <i>Aspergillus novofumigatus</i> IBT 16806    | P174DRAFT_366288            | XP_024683986 | 662   | 100%           | 0.0       | 76.42%   |                     |
| <i>Aspergillus udagawae</i> IFM 46973         | AUD_6969                    | GAO88009.1   | 627   | 99%            | 0.0       | 73.93%   |                     |
| <i>Aspergillus turcosus</i> HMR AF 1038       | CFD26_100067                | RLL94546     | 52.8  | 21%            | 3,00E-06  | 33.65%   | Outside the cluster |
| <i>Aspergillus thermomutatus</i> HMR Af 39    | CDV56_100588                | XP_026610439 | 497   | 93%            | 3,00E-173 | 61.67%   |                     |
| <i>Penicillium flavigenum</i> IBT 14082       | PENFLA_c002G10567           | OQE30980     | 58.9  | 13%            | 4,00E-08  | 39.71%   | Outside the cluster |
| <i>Penicillium expansum</i> MD-8              | PEX2_011700                 | XP_016603801 | 63.2  | 34%            | 2,00E-09  | 30.11%   |                     |
| <i>Bipolaris vicotriai</i> FI3                | COCVIDRAFT_21711            | XP_014562255 | 102   | 14%            | 2,00E-22  | 65.28%   |                     |
| <i>Elsinoe ampelina</i> CECT 20119            | BDZ85DRAFT_46612            | KAF2219168   | 50.1  | 11%            | 2,00E-05  | 45.45%   |                     |
| <i>Coleophoma cylindrospora</i> BP6252        | BP6252_11167                | RDW63622     | 59.7  | 41%            | 2,00E-08  | 27.80%   | Outside the cluster |
| <i>Colletotrichum fructicola</i> CGMCC3.17371 | CGMCC3_g536                 | XP_031892997 | 58.2  | 15%            | 1,00E-07  | 33.78%   | Outside the cluster |
| <i>Colletotrichum asianum</i> ICMP 18580      | GQ607_003323                | KAF0329374   | 58.9  | 15%            | 5,00E-08  | 33.33%   | Outside the cluster |
| <i>Trichoderma virens</i> Gv29-8              | TRIV-IDRAFT_191964          | EHK21730     | 80.9  | 13%            | 4,00E-15  | 53.03%   | Outside the cluster |
| <i>Torrubiella hemipterigena</i> BCC 1449     | VHEMI02390                  | CEJ82319     | 57.0  | 13%            | 2,00E-07  | 46.75%   |                     |
| <i>Penicillium zonata</i> CBS 506.65          | ASPZO-DRAFT_26543           | XP_022580460 | 53.9  | 10%            | 2,00E-06  | 47.17%   |                     |
| <i>Trichoderma reesei</i> RUT C-30            | M419DRAFT_91236             | ETR97558     | 54.7  | 17%            | 1,00E-06  | 37.36%   |                     |
| <i>Rhizodiscina lignyota</i> CBS 133067       | NA57DRAFT_32427             | KAF2103428   | 48.5  | 15%            | 1,00E-04  | 33.33%   |                     |
| <i>Trichoderma reesei</i> QM6a                | TRIIR-DRAFT_52368           | XP_006969323 | 54.7  | 17%            | 1,00E-06  | 37.36%   | Outside the cluster |
| <i>Trichoderma harzianum</i> TR274            | CI102_1866                  | PKK53447     | 48.9  | 12%            | 8,00E-05  | 35.48%   |                     |
| <i>Trichoderma harzianum</i> CBS 226.95       | M431DRAFT_145743            | XP_024772674 | 49.3  | 12%            | 7,00E-05  | 35.48%   |                     |
| <i>Trichoderma parareesei</i> CBS 125925      | A9Z42_0037330               | OTA00068     | 50.8  | 15%            | 2,00E-05  | 37.18%   | Outside the cluster |

|                                               | GliI (Aminotransferase) |              |       |                |           |          |                     |
|-----------------------------------------------|-------------------------|--------------|-------|----------------|-----------|----------|---------------------|
|                                               | Locus tag               | Accession    | Score | Query Coverage | E value   | Identity |                     |
| <i>Aspergillus fumigatus</i> Af293            | AFUA_6G09640            | XP_750853    | 898   | 100%           | 0.0       | 100.00%  | Outside the cluster |
| <i>Aspergillus fumigatus</i> A1163            | AFUB_075690             | EDP49539     | 896   | 100%           | 0.0       | 99.77%   |                     |
| <i>Aspergillus fischerii</i> NRRL 181         | NFIA_055330             | XP_001258081 | 825   | 99%            | 0.0       | 91.94%   |                     |
| <i>Aspergillus lentulus</i> IFM 54703         | ALT_0511                | GAQ03190     | 783   | 99%            | 0.0       | 87.79%   |                     |
| <i>Aspergillus novofumigatus</i> IBT 16806    | P174DRAFT_458936        | XP_024683985 | 774   | 99%            | 0.0       | 87.07%   |                     |
| <i>Aspergillus udagawae</i> IFM 46973         | AUD_6970                | GAO88010     | 773   | 99%            | 0.0       | 85.81%   |                     |
| <i>Aspergillus turcosus</i> HMR AF 1038       | CFD26_103418            | RLL93875     | 754   | 100%           | 0.0       | 84.21%   |                     |
| <i>Aspergillus thermomutatus</i> HMR Af 39    | CDV56_100893            | RHZ44668     | 737   | 97%            | 0.0       | 84.15%   |                     |
| <i>Penicillium flavigenum</i> IBT 14082       | PENFLA_c013G03953       | OQE22181     | 521   | 98%            | 0.0       | 60.46%   |                     |
| <i>Penicillium expansum</i> MD-8              | PEX2_011690             | XP_016603800 | 347   | 90%            | 6,00E-116 | 48.85%   |                     |
| <i>Bipolaris vicotriiae</i> FI3               | COCVIDRAFT_84446        | EUN32660     | 347   | 95%            | 2,00E-114 | 43.91%   |                     |
| <i>Elsinoe ampelina</i> CECT 20119            | BDZ85DRAFT_206595       | KAF2219174   | 235   | 89%            | 4,00E-72  | 36.27%   |                     |
| <i>Coleophoma cylindrospora</i> BP6252        | BP6252_07497            | RDW70934     | 419   | 96%            | 1,00E-142 | 51.05%   |                     |
| <i>Colletotrichum fructicola</i> CGMCC3.17371 | CGMCC3_g22277           | XP_031891505 | 180   | 88%            | 1,00E-50  | 31.00%   |                     |
| <i>Colletotrichum asianum</i> ICMP 18580      | GQ607_003912            | KAF03288871  | 166   | 37%            | 1,00E-48  | 52.80%   |                     |
| <i>Trichoderma virens</i> Gv29-8              | TRIV-IDRAFT_53497       | EHK22001     | 437   | 96%            | 2,00E-150 | 51.77%   |                     |
| <i>Torrubiella hemipterigena</i> BCC 1449     | VHEMI02396              | CEJ82325     | 416   | 97%            | 1,00E-141 | 48.00%   |                     |
| <i>Penicillium zonata</i> CBS 506.65          | ASPZO-DRAFT_68501       | XP_022580458 | 344   | 95%            | 2,00E-114 | 44.34%   |                     |
| <i>Trichoderma reesei</i> RUT C-30            | M419DRAFT_133449        | ETR98471     | 316   | 96%            | 4,00E-103 | 38.99%   |                     |
| <i>Rhizodiscina lignyota</i> CBS 133067       | NA57DRAFT_49544         | KAF2092843   | 326   | 96%            | 1,00E-106 | 41.28%   |                     |
| <i>Trichoderma reesei</i> QM6a                | TRIIRE-DRAFT_54160      | XP_006961383 | 317   | 97%            | 2,00E-103 | 39.04%   |                     |
| <i>Trichoderma harzianum</i> TR274            | CI102_1859              | PKK53438     | 335   | 96%            | 3,00E-110 | 40.60%   |                     |
| <i>Trichoderma harzianum</i> CBS 226.95       | M431DRAFT_555938        | XP_024772667 | 335   | 96%            | 1,00E-110 | 40.60%   |                     |
| <i>Trichoderma parareesei</i> CBS 125925      | A9Z42_0047280           | OTA04145     | 101   | 22%            | 8,00E-25  | 44.44%   |                     |

|                                                | GliJ (dipeptidase) |              |       |                |           |          |                     |
|------------------------------------------------|--------------------|--------------|-------|----------------|-----------|----------|---------------------|
|                                                | Locus tag          | Accession    | Score | Query Coverage | E value   | Identity |                     |
| <i>Aspergillus fumigatus</i> Af293             | AFUA_6G09650       | XP_750854    | 796   | 100%           | 0.0       | 100.00%  | Outside the cluster |
| <i>Aspergillus fumigatus</i> A1163             | AFUB_075700        | EDP49540     | 794   | 100%           | 0.0       | 99.74%   |                     |
| <i>Aspergillus fischerii</i> NRRL 181          | NFIA_055340        | XP_001258082 | 754   | 100%           | 0.0       | 95.36%   |                     |
| <i>Aspergillus lentulus</i> IFM 54703          | ALT_0510           | GAQ03189     | 734   | 99%            | 0.0       | 91.47%   |                     |
| <i>Aspergillus novofumigatus</i> IBT 16806     | P174DRAFT_367031   | XP_024683984 | 726   | 100%           | 0.0       | 91.24%   |                     |
| <i>Aspergillus udagawae</i> IFM 46973          | AUD_6971           | GAO88011     | 651   | 100%           | 0.0       | 83.51%   |                     |
| <i>Aspergillus turcosus</i> HMR AF 1038        | CFD26_103275       | RLL93874     | 712   | 98%            | 0.0       | 89.06%   |                     |
| <i>Aspergillus thermomutatus</i> HMR Af 39     | XP_026610441       | CDV56_101176 | 712   | 100%           | 0.0       | 88.40%   |                     |
| <i>Penicillium flavigenum</i> IBT 14082        | PENFLA_c013G03435  | OQE22014     | 435   | 97%            | 7,00E-152 | 57.74%   |                     |
| <i>Penicillium expansum</i> MD-8               | PEX2_011790        | KGO63390.1   | 248   | 97%            | 1,00E-78  | 39.58%   |                     |
| <i>Bipolaris vicotriai</i> FI3                 | COCVIDRAFT_84229   | EUN32653     | 439   | 94%            | 7,00E-153 | 58.54%   |                     |
| <i>Elsinoe ampelina</i> CECT 20119             | BDZ85DRAFT_305117  | KAF2219171   | 399   | 92%            | 3,00E-137 | 54.42%   |                     |
| <i>Coleophoma cylindrospora</i> BP6252         | BP6252_07501       | RDW70938     | 409   | 96%            | 1,00E-140 | 53.28%   |                     |
| <i>Colletotrichum fructicola</i> CGMCCC3.17371 | CGMCCC3_g11502     | XP_031881996 | 390   | 93%            | 2,00E-133 | 52.69%   |                     |
| <i>Colletotrichum asianum</i> ICMP 18580       | GQ607_001290       | KAF0331544   | 295   | 93%            | 3,00E-95  | 41.96%   |                     |
| <i>Trichoderma virens</i> Gv29-8               | TRIV-IDRAFT_216163 | EHK21959     | 419   | 99%            | 1,00E-144 | 52.81%   |                     |
| <i>Torrubiella hemipterigena</i> BCC 1449      | VHEMI02395         | CEJ82324     | 423   | 96%            | 2,00E-146 | 55.29%   |                     |
| <i>Penicillium zonata</i> CBS 506.65           | ASPZO-DRAFT_547278 | OJJ45949     | 420   | 97%            | 2,00E-145 | 54.83%   |                     |
| <i>Trichoderma reesei</i> RUT C-30             | M419DRAFT_133453   | ETR98475.1   | 405   | 96%            | 3,00E-139 | 54.52%   |                     |
| <i>Rhizodiscina lignyota</i> CBS 133067        | NA57DRAFT_49457    | KAF2092846   | 390   | 95%            | 2,00E-133 | 51.60%   |                     |
| <i>Trichoderma reesei</i> QM6a                 | TRIREDRAFT_103119  | XP_006961835 | 405   | 95%            | 3,00E-139 | 54.52%   |                     |
| <i>Trichoderma harzianum</i> TR274             | CI102_1863         | PKK53444     | 369   | 90%            | 1,00E-125 | 51.97%   |                     |
| <i>Trichoderma harzianum</i> CBS 226.95        | M431DRAFT_555948   | PTB52994     | 367   | 90%            | 5,00E-125 | 51.69%   |                     |
| <i>Trichoderma parareesei</i> CBS 125925       | A9Z42_0047000      | OTA04141     | 410   | 95%            | 2,00E-141 | 54.28%   |                     |

|                                                | GliP (Nonribosomal peptide synthase) |              |       |                |         |          |
|------------------------------------------------|--------------------------------------|--------------|-------|----------------|---------|----------|
|                                                | Locus tag                            | Accession    | Score | Query Coverage | E value | Identity |
| <i>Aspergillus fumigatus</i> Af293             | AFUA_6G09660                         | EAL88817     | 4396  | 100%           | 0.0     | 100.00%  |
| <i>Aspergillus fumigatus</i> A1163             | AFUB_075710                          | EDP49541     | 4386  | 100%           | 0.0     | 99.77%   |
| <i>Aspergillus fischerii</i> NRRL 181          | NFIA_055350                          | XP_001258083 | 4152  | 100%           | 0.0     | 94.75%   |
| <i>Aspergillus lentulus</i> IFM 54703          | ALT_0509                             | GAQ03188     | 4101  | 100%           | 0.0     | 93.13%   |
| <i>Aspergillus novofumigatus</i> IBT 16806     | P174DRAFT_511160                     | XP_024683983 | 4012  | 100%           | 0.0     | 92.06%   |
| <i>Aspergillus udagawae</i> IFM 46973          | AUD_6972                             | GAO88012     | 3920  | 100%           | 0.0     | 89.30%   |
| <i>Aspergillus turcosus</i> HMR AF 1038        | CFD26_102651                         | RLL93873     | 3896  | 100%           | 0.0     | 88.42%   |
| <i>Aspergillus thermomutatus</i> HMR Af 39     | CDV56_101444                         | XP_026610442 | 3779  | 100%           | 0.0     | 87.07%   |
| <i>Penicillium flavigenum</i> IBT 14082        | PENFLA_c013G03821                    | OQE22222     | 2652  | 99%            | 0.0     | 60.95%   |
| <i>Penicillium expansum</i> MD-8               | PEX2_011780                          | XP_016603809 | 2644  | 99%            | 0.0     | 61.24%   |
| <i>Bipolaris vicotriiae</i> FI3                | COCVIDRAFT_32734                     | EUN32662     | 1969  | 95%            | 0.0     | 47.29%   |
| <i>Elsinoe ampelina</i> CECT 20119             | BDZ85DRAFT_305103                    | KAF2219165   | 1712  | 99%            | 0.0     | 44.93%   |
| <i>Coleophoma cylindrospora</i> BP6252         | BP6252_07505                         | RDW70942     | 1642  | 95%            | 0.0     | 44.21%   |
| <i>Colletotrichum fructicola</i> CGMCCC3.17371 | CGMCCC3_g11493                       | XP_031882093 | 1640  | 94%            | 0.0     | 44.00%   |
| <i>Colletotrichum asianum</i> ICMP 18580       | GQ607_003908                         | KAF0328883   | 1627  | 94%            | 0.0     | 44.09%   |
| <i>Trichoderma virens</i> Gv29-8               | TRIV-IDRAFT_78708                    | EHK22005     | 1621  | 94%            | 0.0     | 43.99%   |
| <i>Torrubiella hemipterigena</i> BCC 1449      | VHEMI02393                           | CEJ82322     | 1718  | 94%            | 0.0     | 41.43%   |
| <i>Penicillium zonata</i> CBS 506.65           | ASPZO-DRAFT_160119                   | XP_022580453 | 1481  | 96%            | 0.0     | 42.54%   |
| <i>Trichoderma reesei</i> RUT C-30             | M419DRAFT_133451                     | ETR98473     | 1461  | 98%            | 0.0     | 39.94%   |
| <i>Rhizodiscina lignyota</i> CBS 133067        | NA57DRAFT_81988                      | KAF2092841   | 1461  | 98%            | 0.0     | 39.34%   |
| <i>Trichoderma reesei</i> QM6a                 | TRIREDRAFT_24586                     | XP_006961011 | 1461  | 98%            | 0.0     | 39.94%   |
| <i>Trichoderma harzianum</i> TR274             | CI102_1861                           | PKK53446     | 1453  | 99%            | 0.0     | 38.55%   |
| <i>Trichoderma harzianum</i> CBS 226.95        | M431DRAFT_496332                     | XP_024772669 | 1453  | 99%            | 0.0     | 38.55%   |
| <i>Trichoderma parareesei</i> CBS 125925       | A9Z42_0047170                        | OTA04143     | 1433  | 99%            | 0.0     | 39.13%   |

|                                               | GliC (P450 oxidoreductase) |              |       |                |           |          |
|-----------------------------------------------|----------------------------|--------------|-------|----------------|-----------|----------|
|                                               | Locus tag                  | Accession    | Score | Query Coverage | E value   | Identity |
| <i>Aspergillus fumigatus</i> Af293            | AFUA_6G09670               | EAL88818     | 1060  | 100%           | 0.0       | 100.00%  |
| <i>Aspergillus fumigatus</i> A1163            | AFUB_075720                | EDP49542     | 1056  | 100%           | 0.0       | 99.61%   |
| <i>Aspergillus fischerii</i> NRRL 181         | NFIA_055360                | XP_001258084 | 1019  | 100%           | 0.0       | 95.71%   |
| <i>Aspergillus lentulus</i> IFM 54703         | ALT_0508                   | GAQ03187     | 1003  | 100%           | 0.0       | 92.98%   |
| <i>Aspergillus novofumigatus</i> IBT 16806    | P174DRAFT_481241           | XP_024683982 | 982   | 100%           | 0.0       | 92.59%   |
| <i>Aspergillus udagawae</i> IFM 46973         | AUD_6973                   | GAO88013     | 973   | 99%            | 0.0       | 90.96%   |
| <i>Aspergillus turcosus</i> HMR AF 1038       | CFD26_102418               | RLL93872     | 930   | 100%           | 0.0       | 87.16%   |
| <i>Aspergillus thermomutatus</i> HMR Af 39    | CDV56_102362               | XP_026610443 | 948   | 99%            | 0.0       | 89.00%   |
| <i>Penicillium flavigenum</i> IBT 14082       | PENFLA_c013G08698          | OQE22156     | 704   | 99%            | 0.0       | 64.90%   |
| <i>Penicillium expansum</i> MD-8              | PEX2_011770                | XP_016603808 | 536   | 77%            | 0.0       | 64.06%   |
| <i>Bipolaris vicotriai</i> FI3                | COCVIDRAFT_21720           | EUN32661     | 524   | 89%            | 0.0       | 54.72%   |
| <i>Elsinoe ampelina</i> CECT 20119            | BDZ85DRAFT_305107          | KAF2219166   | 486   | 86%            | 1,00E-168 | 54.75%   |
| <i>Coleophoma cylindrospora</i> BP6252        | BP6252_07504               | RDW70941     | 318   | 62%            | 3,00E-104 | 49.54%   |
| <i>Colletotrichum fructicola</i> CGMCC3.17371 | CGMCC3_g11494              | KAE9572544   | 296   | 69%            | 8,00E-95  | 43.96%   |
| <i>Colletotrichum asianum</i> ICMP 18580      | GQ607_003909               | KAF0328884   | 360   | 78%            | 7,00E-119 | 45.28%   |
| <i>Trichoderma virens</i> Gv29-8              | TRIV-IDRAFT_216161         | EHK22004     | 446   | 90%            | 6,00E-152 | 47.64%   |
| <i>Torrubiella hemipterigena</i> BCC 1449     | VHEMI02392                 | CEJ82321     | 434   | 90%            | 6,00E-147 | 46.67%   |
| <i>Penicillium zonata</i> CBS 506.65          | ASPZO-DRAFT_167643         | OJJ45944     | 425   | 94%            | 4,00E-144 | 44.65%   |
| <i>Trichoderma reesei</i> RUT C-30            | M419DRAFT_133450           | ETR98472     | 443   | 96%            | 1,00E-150 | 46.28%   |
| <i>Rhizodiscina lignyota</i> CBS 133067       | NA57DRAFT_49506            | KAF2092842   | 422   | 88%            | 3,00E-143 | 45.43%   |
| <i>Trichoderma reesei</i> QM6a                | TRIREDRAFT_53168           | EGR53014     | 441   | 89%            | 8,00E-151 | 48.59%   |
| <i>Trichoderma harzianum</i> TR274            | CI102_1860                 | PKK53445     | 390   | 82%            | 1,00E-130 | 48.46%   |
| <i>Trichoderma harzianum</i> CBS 226.95       | M431DRAFT_521249           | XP_024772668 | 407   | 89%            | 6,00E-137 | 47.38%   |
| <i>Trichoderma parareesei</i> CBS 125925      | A9Z42_0046970              | OTA04144     | 437   | 87%            | 1,00E-148 | 49.11%   |

|                                               | GliM (O-methyltransferase) |              |       |                |           |          |                     |
|-----------------------------------------------|----------------------------|--------------|-------|----------------|-----------|----------|---------------------|
|                                               | Locus tag                  | Accession    | Score | Query Coverage | E value   | Identity |                     |
| <i>Aspergillus fumigatus</i> Af293            | AFUA_6G09680               | EAL88819     | 887   | 100%           | 0.0       | 100.00%  |                     |
| <i>Aspergillus fumigatus</i> A1163            | AFUB_075730                | EDP49543     | 887   | 100%           | 0.0       | 100.00%  |                     |
| <i>Aspergillus fischerii</i> NRRL 181         | NFIA_055370                | EAW16188     | 854   | 100%           | 0.0       | 96.06%   |                     |
| <i>Aspergillus lentulus</i> IFM 54703         | ALT_0507                   | GAQ03186     | 840   | 100%           | 0.0       | 93.97%   |                     |
| <i>Aspergillus novofumigatus</i> IBT 16806    | P174DRAFT_368520           | XP_024683981 | 840   | 100%           | 0.0       | 93.50%   |                     |
| <i>Aspergillus udagawae</i> IFM 46973         | AUD_6974                   | GAO88014     | 826   | 100%           | 0.0       | 92.58%   |                     |
| <i>Aspergillus turcosus</i> HMR AF 1038       | CFD26_102266               | RLL93871     | 832   | 99%            | 0.0       | 92.09%   |                     |
| <i>Aspergillus thermomutatus</i> HMR Af 39    | CDV56_102666               | RHZ44672     | 758   | 99%            | 0.0       | 83.48%   |                     |
| <i>Penicillium flavigenum</i> IBT 14082       | PENFLA_c013G07948          | OQE22128     | 657   | 100%           | 0.0       | 71.82%   |                     |
| <i>Penicillium expansum</i> MD-8              | PEX2_011760                | KGO63387     | 653   | 95%            | 0.0       | 73.67%   |                     |
| <i>Bipolaris vicotriai</i> FI3                | COCVIDRAFT_84476           | EUN32658     | 437   | 95%            | 7E-151    | 55.66%   |                     |
| <i>Elsinoe ampelina</i> CECT 20119            | BDZ85DRAFT_285636          | KAF2219170   | 442   | 93%            | 5E-153    | 50.86%   |                     |
| <i>Coleophoma cylindrospora</i> BP6252        | BP6252_07506               | RDW70943     | 470   | 96%            | 6E-164    | 52.40%   |                     |
| <i>Colletotrichum fructicola</i> CGMCC3.17371 | CGMCC3_g11498              | KAE9572548   | 459   | 93%            | 2E-159    | 51.84%   |                     |
| <i>Colletotrichum asianum</i> ICMP 18580      | GQ607_014591               | KAF0318223   | 311   | 97%            | 1E-96     | 41.78%   |                     |
| <i>Trichoderma virens</i> Gv29-8              | TRIV-IDRAFT_216154         | EHK21998     | 483   | 96%            | 4E-169    | 55.74%   |                     |
| <i>Torrubiella hemipterigena</i> BCC 1449     | VHEMI02391                 | CEJ82320     | 488   | 93%            | 5E-171    | 58.31%   |                     |
| <i>Penicillium zonata</i> CBS 506.65          | ASPZO-DRAFT_68902          | OJJ45945     | 488   | 94%            | 3E-171    | 54.90%   |                     |
| <i>Trichoderma reesei</i> RUT C-30            | M419DRAFT_38490            | ETR98480     | 350   | 85%            | 8E-117    | 46.92%   |                     |
| <i>Rhizodiscina lignyota</i> CBS 133067       | NA57DRAFT_49558            | KAF2092854   | 354   | 93%            | 1,00E-118 | 42.96%   | Outside the cluster |
| <i>Trichoderma reesei</i> QM6a                | TRIREDRAFT_53025           | EGR53018     | 350   | 85%            | 8,00E-117 | 46.92%   |                     |
| <i>Trichoderma harzianum</i> TR274            | CI102_1869                 | PKK53418     | 347   | 87%            | 1,00E-115 | 44.88%   |                     |
| <i>Trichoderma harzianum</i> CBS 226.95       | M431DRAFT_145749           | PTB52999     | 347   | 87%            | 1,00E-115 | 44.88%   |                     |
| <i>Trichoderma parareesei</i> CBS 125925      | A9Z42_0047250              | OTA04135     | 339   | 77%            | 2,00E-113 | 48.22%   |                     |

|                                               | GliG (glutathione S-transferase) |            |       |                |           |          |                     |
|-----------------------------------------------|----------------------------------|------------|-------|----------------|-----------|----------|---------------------|
|                                               | Locus tag                        | Accession  | Score | Query Coverage | E value   | Identity |                     |
| <i>Aspergillus fumigatus</i> Af293            | AFUA_6G09690                     | EAL88820   | 494   | 100%           | 1,00E-179 | 100.00%  | Outside the cluster |
| <i>Aspergillus fumigatus</i> A1163            | AFUB_075740                      | EDP49544   | 494   | 100%           | 3,00E-179 | 99.58%   |                     |
| <i>Aspergillus fischerii</i> NRRL 181         | NFIA_055380                      | EAW16189   | 488   | 100%           | 1,00E-176 | 97.92%   |                     |
| <i>Aspergillus lentulus</i> IFM 54703         | ALT_0506                         | GAQ03185   | 481   | 100%           | 4,00E-174 | 95.83%   |                     |
| <i>Aspergillus novofumigatus</i> IBT 16806    | P174DRAFT_458931                 | PKX95385   | 479   | 100%           | 1,00E-173 | 96.25%   |                     |
| <i>Aspergillus udagawae</i> IFM 46973         | AUD_6975                         | GAO88015   | 481   | 100%           | 3,00E-174 | 95.83%   |                     |
| <i>Aspergillus turcosus</i> HMR AF 1038       | CFD26_102131                     | RLL93870   | 463   | 100%           | 4,00E-167 | 91.67%   |                     |
| <i>Aspergillus thermomutatus</i> HMR Af 39    | CDV56_102892                     | RHZ44673   | 466   | 100%           | 4,00E-168 | 92.08%   |                     |
| <i>Penicillium flavigenum</i> IBT 14082       | PENFLA_c013G05520                | OQE22140   | 408   | 98%            | 3,00E-145 | 81.78%   |                     |
| <i>Penicillium expansum</i> MD-8              | PEX2_011750                      | KGO63386   | 400   | 98%            | 2,00E-142 | 80.08%   |                     |
| <i>Bipolaris vicotriai</i> FI3                | COCVIDRAFT_32732                 | EUN32657   | 345   | 97%            | 3,00E-120 | 70.39%   |                     |
| <i>Elsinoe ampelina</i> CECT 20119            | BDZ85DRAFT_46730                 | KAF2219179 | 218   | 91%            | 5,00E-70  | 44.00%   |                     |
| <i>Coleophoma cylindrospora</i> BP6252        | BP6252_07498                     | RDW70935   | 300   | 95%            | 2,00E-102 | 58.89%   |                     |
| <i>Colletotrichum fructicola</i> CGMCC3.17371 | CGMCC3_g11496                    | KAE9572543 | 211   | 60%            | 6,00E-69  | 69.66%   |                     |
| <i>Colletotrichum asianum</i> ICMP 18580      | GQ607_002621                     | KAF0330291 | 76.3  | 80%            | 1,00E-15  | 28.37%   |                     |
| <i>Trichoderma virens</i> Gv29-8              | TRIV-IDRAFT_216157               | EHK22000   | 313   | 95%            | 5,00E-108 | 68.12%   |                     |
| <i>Torrubiella hemipterigena</i> BCC 1449     | VHEMI02397                       | CEJ82326   | 312   | 95%            | 1,00E-107 | 64.78%   |                     |
| <i>Penicillium zonata</i> CBS 506.65          | ASPZO-DRAFT_68717                | OJJ45947   | 178   | 86%            | 1,00E-54  | 45.50%   |                     |
| <i>Trichoderma reesei</i> RUT C-30            | M419DRAFT_64348                  | ETR98476   | 164   | 82%            | 1,00E-49  | 43.07%   |                     |
| <i>Rhizodiscina lignyota</i> CBS 133067       | NA57DRAFT_69594                  | KAF2092847 | 170   | 86%            | 1,00E-51  | 42.45%   |                     |
| <i>Trichoderma reesei</i> QM6a                | TRIREDRAFT_32402                 | EGR53016   | 164   | 82%            | 1,00E-49  | 43.07%   |                     |
| <i>Trichoderma harzianum</i> TR274            | CI102_1864                       | PKK53449   | 156   | 82%            | 4,00E-46  | 40.59%   |                     |
| <i>Trichoderma harzianum</i> CBS 226.95       | M431DRAFT_496335                 | PTB52995   | 156   | 82%            | 4,00E-46  | 40.59%   |                     |
| <i>Trichoderma parareesei</i> CBS 125925      | A9Z42_0047200                    | OTA04140   | 171   | 90%            | 7,00E-52  | 41.82%   |                     |

|                                        | GliK ( Gamma-glutamylcyclotransferase) |            |       |                |           |          |                     |
|----------------------------------------|----------------------------------------|------------|-------|----------------|-----------|----------|---------------------|
|                                        | Locus tag                              | Accession  | Score | Query Coverage | E value   | Identity |                     |
| Aspergillus fumigatus Af293            | AFUA_6G09700                           | EAL88821   | 560   | 100%           | 0.0       | 100.00%  | Outside the cluster |
| Aspergillus fumigatus A1163            | AFUB_075750                            | EDP49545   | 560   | 100%           | 0.0       | 100.00%  |                     |
| Aspergillus fischerii NRRL 181         | NFIA_055390                            | EAW16190.1 | 511   | 98%            | 0.0       | 92.19%   |                     |
| Aspergillus lentulus IFM 54703         | ALT_0505                               | GAQ03184   | 508   | 98%            | 0.0       | 90.71%   |                     |
| Aspergillus novofumigatus IBT 16806    | P174DRAFT_429762                       | PKX95384   | 504   | 98%            | 0.0       | 90.33%   |                     |
| Aspergillus udagawae IFM 46973         | AUD_6976                               | GAO88016   | 477   | 98%            | 2,00E-171 | 88.48%   |                     |
| Aspergillus turcosus HMR AF 1038       | CFD26_102022                           | RLL93869   | 492   | 96%            | 2,00E-177 | 88.64%   |                     |
| Aspergillus thermomutatus HMR Af 39    | CDV56_103027                           | RHZ44674   | 483   | 96%            | 7,00E-174 | 86.36%   |                     |
| Penicillium flavigenum IBT 14082       | PENFLA_c013G07766                      | OQE22030   | 199   | 53%            | 3,00E-63  | 68.03%   |                     |
| Penicillium expansum MD-8              | PEX2_011740                            | KGO63385   | 196   | 53%            | 5,00E-62  | 66.67%   |                     |
| Bipolaris vicotriai FI3                | COCVIDRAFT_84291                       | EUN32656.1 | 259   | 92%            | 1,00E-85  | 55.04%   |                     |
| Elsinoe ampelina CECT 20119            | BDZ85DRAFT_285643                      | KAF2219178 | 190   | 91%            | 2,00E-58  | 40.08%   |                     |
| Coleophoma cylindrospora BP6252        | BP6252_07500                           | RDW70937   | 235   | 89%            | 5,00E-76  | 46.12%   |                     |
| Colletotrichum fructicola CGMCC3.17371 | CGMCC3_g9322                           | KAE9574802 | 65.9  | 79%            | 4,00E-11  | 25.09%   |                     |
| Colletotrichum asianum ICMP 18580      | GQ607_003911                           | KAF0328886 | 221   | 90%            | 8,00E-71  | 44.13%   |                     |
| Trichoderma virens Gv29-8              | TRIV-IDRAFT_151379                     | EHK22002   | 239   | 89%            | 4,00E-78  | 46.94%   |                     |
| Torrubiella hemipterigena BCC 1449     | VHEMI02394                             | CEJ82323   | 254   | 93%            | 1,00E-83  | 47.91%   |                     |
| Penicillium zonata CBS 506.65          | ASPZO-DRAFT_17375                      | OJJ45946   | 201   | 91%            | 1,00E-62  | 43.18%   |                     |
| Trichoderma reesei RUT C-30            | M419DRAFT_88682                        | ETR98474   | 197   | 94%            | 4,00E-61  | 39.69%   |                     |
| Rhizodiscina lignyota CBS 133067       | NA57DRAFT_69592                        | KAF2092845 | 208   | 91%            | 2,00E-65  | 42.97%   |                     |
| Trichoderma reesei QM6a                | TRIREDRAFT_54784                       | EGR52475   | 197   | 94%            | 4,00E-61  | 39.69%   |                     |
| Trichoderma harzianum TR274            | CI102_1862                             | PKK53443   | 197   | 94%            | 3,00E-61  | 40.93%   |                     |
| Trichoderma harzianum CBS 226.95       | M431DRAFT_88512                        | PTB5299    | 197   | 94%            | 3,00E-61  | 40.93%   |                     |
| Trichoderma parareesei CBS 125925      | A9Z42_0047010                          | OTA04142   | 197   | 94%            | 6,00E-61  | 39.30%   |                     |

|                                        | GliA (MFS - efflux channel) |            |       |                |           |          |                     |
|----------------------------------------|-----------------------------|------------|-------|----------------|-----------|----------|---------------------|
|                                        | Locus tag                   | Accession  | Score | Query Coverage | E value   | Identity |                     |
| Aspergillus fumigatus Af293            | AFUA_6G09710                | EAL88822   | 1081  | 100%           | 0.0       | 100.00%  |                     |
| Aspergillus fumigatus A1163            | AFUB_075760                 | EDP49546   | 1081  | 100%           | 0.0       | 100.00%  |                     |
| Aspergillus fischerii NRRL 181         | NFIA_055400                 | EAW16191   | 1040  | 99%            | 0.0       | 96.30%   |                     |
| Aspergillus lentulus IFM 54703         | ALT_0504                    | GAQ03183   | 969   | 100%           | 0.0       | 93.91%   |                     |
| Aspergillus novofumigatus IBT 16806    | P174DRAFT_367489            | PKX95383   | 978   | 100%           | 0.0       | 94.10%   |                     |
| Aspergillus udagawae IFM 46973         | AUD_6977                    | GAO88017   | 996   | 100%           | 0.0       | 92.80%   |                     |
| Aspergillus turcosus HMR AF 1038       | CFD26_101781                | RLL93868   | 946   | 99%            | 0.0       | 89.13%   |                     |
| Aspergillus thermomutatus HMR Af 39    | CDV56_103194                | RHZ44675   | 926   | 100%           | 0.0       | 89.30%   |                     |
| Penicillium flavigenum IBT 14082       | PENFLA_c008G02142           | OQE25695   | 451   | 98%            | 1,00E-151 | 42.49%   | Outside the cluster |
| Penicillium expansum MD-8              | PEX2_081320                 | KGO61278   | 501   | 97%            | 2,00E-170 | 46.75%   | Outside the cluster |
| Bipolaris vicotriai FI3                | COCVIDRAFT_108412           | EUN23555   | 469   | 96%            | 5,00E-160 | 44.28%   | Outside the cluster |
| Elsinoe ampelina CECT 20119            | BDZ85DRAFT_172137           | KAF2221582 | 512   | 91%            | 2,00E-177 | 51.51%   | Outside the cluster |
| Coleophoma cylindrospora BP6252        | BP6252_07509                | RDW70946   | 376   | 98%            | 5,00E-123 | 35.99%   |                     |
| Colletotrichum fructicola CGMCC3.17371 | CGMCC3_g11500               | KAE9572451 | 457   | 90%            | 3,00E-155 | 45.64%   |                     |
| Colletotrichum asianum ICMP 18580      | GQ607_000787                | KAF0331667 | 527   | 97%            | 0.0       | 48.86%   | Outside the cluster |
| Trichoderma virens Gv29-8              | TRIV-IDRAFT_216146          | EHK22068   | 449   | 88%            | 7,00E-152 | 45.42%   | Outside the cluster |
| Torrubiella hemipterigena BCC 1449     | VHEMI01223                  | CEJ81073   | 452   | 97%            | 7,00E-153 | 43.56%   | Outside the cluster |
| Penicillium zonata CBS 506.65          | ASPZO-DRAFT_133807          | OJJ45940   | 494   | 88%            | 2,00E-170 | 53.00%   |                     |
| Trichoderma reesei RUT C-30            | M419DRAFT_67631             | ETS06688   | 434   | 97%            | 3,00E-145 | 43.75%   | Outside the cluster |
| Rhizodiscina lignyota CBS 133067       | NA57DRAFT_42743             | KAF2096360 | 521   | 96%            | 4,00E-180 | 49.33%   | Outside the cluster |
| Trichoderma reesei QM6a                | TRIREDRAFT_53503            | EGR52888   | 449   | 97%            | 1,00E-151 | 45.18%   | Outside the cluster |
| Trichoderma harzianum TR274            | CI102_8510                  | PKK49097   | 405   | 83%            | 2,00E-135 | 44.40%   | Outside the cluster |
| Trichoderma harzianum CBS 226.95       | M431DRAFT_112430            | PTB56957   | 474   | 98%            | 2,00E-161 | 45.97%   | Outside the cluster |
| Trichoderma parareesei CBS 125925      | A9Z42_0045760               | OTA04036   | 446   | 97%            | 3,00E-150 | 45.57%   | Outside the cluster |

|                                               | GliN (methyltransferase) |            |       |                |           |          |                     |
|-----------------------------------------------|--------------------------|------------|-------|----------------|-----------|----------|---------------------|
|                                               | Locus tag                | Accession  | Score | Query Coverage | E value   | Identity |                     |
| <i>Aspergillus fumigatus</i> Af293            | AFUA_6G09720             | EAL88823   | 580   | 100%           | 0.0       | 100.00%  |                     |
| <i>Aspergillus fumigatus</i> A1163            | AFUB_075770              | EDP49547   | 580   | 100%           | 0.0       | 100.00%  |                     |
| <i>Aspergillus fischerii</i> NRRL 181         | NFIA_055410              | EAW16192   | 559   | 100%           | 0.0       | 94.68%   |                     |
| <i>Aspergillus lentulus</i> IFM 54703         | ALT_0503                 | GAQ03182   | 548   | 100%           | 0.0       | 92.55%   |                     |
| <i>Aspergillus novofumigatus</i> IBT 16806    | P174DRAFT_502743         | PKX95382   | 471   | 100%           | 5,00E-169 | 84.04%   |                     |
| <i>Aspergillus udagawae</i> IFM 46973         | AUD_6978                 | GAO88018   | 560   | 100%           | 0.0       | 95.74%   |                     |
| <i>Aspergillus turcosus</i> HMR AF 1038       | CFD26_101626             | RLL93867   | 526   | 100%           | 0.0       | 90.49%   |                     |
| <i>Aspergillus thermomutatus</i> HMR Af 39    | CDV56_103425             | RHZ44676   | 521   | 100%           | 0.0       | 86.88%   |                     |
| <i>Penicillium flavigenum</i> IBT 14082       | PENFLA_c013G04011        | OQE22012   | 138   | 96%            | 5E-38     | 32.87%   |                     |
| <i>Penicillium expansum</i> MD-8              | PEX2_011710              | KGO63382   | 137   | 96%            | 8,00E-38  | 32.87%   |                     |
| <i>Bipolaris vicotriai</i> FI3                | COCVIDRAFT_11169         | EUN32655   | 128   | 98%            | 2,00E-34  | 30.88%   |                     |
| <i>Elsinoe ampelina</i> CECT 20119            | BDZ85DRAFT_46687         | KAF2219173 | 110   | 96%            | 2,00E-27  | 27.90%   |                     |
| <i>Coleophoma cylindrospora</i> BP6252        | BP6252_07499             | RDW70936   | 341   | 97%            | 3,00E-117 | 55.94%   |                     |
| <i>Colletotrichum fructicola</i> CGMCC3.17371 | CGMCC3_g11495            | KAE9572551 | 333   | 98%            | 3,00E-114 | 56.38%   |                     |
| <i>Colletotrichum asianum</i> ICMP 18580      | GQ607_003910             | KAF0328885 | 339   | 98%            | 9,00E-117 | 57.09%   |                     |
| <i>Trichoderma virens</i> Gv29-8              | TRIV-IDRAFT_91355        | EHK22003   | 342   | 98%            | 6,00E-118 | 57.55%   |                     |
| <i>Torrubiella hemipterigena</i> BCC 1449     | VHEMI02398               | CEJ82327   | 132   | 96%            | 1,00E-35  | 28.36%   |                     |
| <i>Penicillium zonata</i> CBS 506.65          | ASPZO-DRAFT_66834        | OJJ46766   | 77.8  | 75%            | 3,00E-15  | 27.75%   | Outside the cluster |
| <i>Trichoderma reesei</i> RUT C-30            | M419DRAFT_11794          | ETR98470   | 108   | 97%            | 6,00E-27  | 27.24%   | Outside the cluster |
| <i>Rhizodiscina lignyota</i> CBS 133067       | NA57DRAFT_69591          | KAF2092844 | 118   | 96%            | 1,00E-30  | 29.71%   |                     |
| <i>Trichoderma reesei</i> QM6a                | TRIREDRAFT_103114        | EGR53013   | 108   | 97%            | 6,00E-27  | 27.24%   | Outside the cluster |
| <i>Trichoderma harzianum</i> TR274            | CI102_1858               | PKK53439   | 117   | 97%            | 3,00E-30  | 27.14%   |                     |
| <i>Trichoderma harzianum</i> CBS 226.95       | M431DRAFT_118424         | PTB52989   | 117   | 97%            | 3,00E-30  | 27.14%   |                     |
| <i>Trichoderma parareesei</i> CBS 125925      | A9Z42_0047230            | OTA04146   | 105   | 81%            | 4,00E-26  | 29.49%   |                     |

|                                        | GliF (cytochrome P450 oxidoreductase) |                   |       |                |           |          |                     |
|----------------------------------------|---------------------------------------|-------------------|-------|----------------|-----------|----------|---------------------|
|                                        | Locus tag                             | Accession         | Score | Query Coverage | E value   | Identity |                     |
| Aspergillus fumigatus Af293            | AFUA_6G09730                          | EAL88824          | 1033  | 100%           | 0.0       | 1        |                     |
| Aspergillus fumigatus A1163            | AFUB_075780                           | EDP49548          | 1033  | 100%           | 0.0       | 99.80%   |                     |
| Aspergillus fischerii NRRL 181         | NFIA_055420                           | EAW16193          | 1008  | 100%           | 0.0       | 96.63%   |                     |
| Aspergillus lentulus IFM 54703         | ALT_0502                              | GAQ03181          | 997   | 99%            | 0.0       | 95.43%   |                     |
| Aspergillus novofumigatus IBT 16806    | P174DRAFT_458927                      | PKX95381          | 993   | 100%           | 0.0       | 95.44%   |                     |
| Aspergillus udagawae IFM 46973         | AUD_6979                              | GAO88019          | 978   | 99%            | 0.0       | 93.64%   |                     |
| Aspergillus turcosus HMR AF 1038       | CFD26_101410                          | RLL93866          | 948   | 98%            | 0.0       | 92.96%   |                     |
| Aspergillus thermomutatus HMR Af 39    | CDV56_103568                          | RHZ44677          | 938   | 100%           | 0.0       | 90.30%   |                     |
| Penicillium flavigenum IBT 14082       | PENFLA_c008G02011                     | PENFLA_c008G02011 | 182   | 80%            | 2,00E-50  | 31.16%   | Outside the cluster |
| Penicillium expansum MD-8              | PEX2_090260                           | KGO54773          | 192   | 89%            | 6,00E-54  | 30.94%   | Outside the cluster |
| Bipolaris vicotriai FI3                | COCVIDRAFT_32765                      | EUN32704          | 180   | 83%            | 1,00E-49  | 30.21%   | Outside the cluster |
| Elsinoe ampelina CECT 20119            | BDZ85DRAFT_305131                     | KAF2219176        | 551   | 92%            | 0.0       | 58.67%   |                     |
| Coleophoma cylindrospora BP6252        | BP6252_07507                          | RDW70944          | 627   | 96%            | 0.0       | 63.60%   |                     |
| Colletotrichum fructicola CGMCC3.17371 | CGMCC3_g11497                         | KAE9572550        | 517   | 95%            | 1,00E-180 | 56.22%   |                     |
| Colletotrichum asianum ICMP 18580      | GQ607_003389                          | KAF0329440        | 239   | 99%            | 7,00E-72  | 32.95%   | Outside the cluster |
| Trichoderma virens Gv29-8              | TRIV-IDRAFT_91346                     | EHK21999          | 625   | 99%            | 0.0       | 61.46%   |                     |
| Torrubiella hemipterigena BCC 1449     | VHEMI06866                            | CEJ91133          | 181   | 78%            | 8,00E-51  | 29.46%   | Outside the cluster |
| Penicillium zonata CBS 506.65          | ASPZO-DRAFT_1360433                   | OJJ48948          | 167   | 88%            | 2,00E-44  | 26.54%   | Outside the cluster |
| Trichoderma reesei RUT C-30            | M419DRAFT_85856                       | ETR99471          | 205   | 97%            | 1,00E-58  | 30.63%   | Outside the cluster |
| Rhizodiscina lignyota CBS 133067       | NA57DRAFT_52344                       | KAF2102792        | 148   | 66%            | 2,00E-39  | 29.82%   | Outside the cluster |
| Trichoderma reesei QM6a                | TRIIE-DRAFT_66453                     | EGR46455          | 205   | 97%            | 1,00E-58  | 30.63%   | Outside the cluster |
| Trichoderma harzianum TR274            | CI102_12316                           | PKK44048          | 203   | 92%            | 4,00E-58  | 29.50%   | Outside the cluster |
| Trichoderma harzianum CBS 226.95       | M431DRAFT_21965                       | PTB47478          | 218   | 97%            | 2,00E-63  | 29.08%   | Outside the cluster |
| Trichoderma parareesei CBS 125925      | A9Z42_0078160                         | OTA07011          | 205   | 97%            | 1,00E-58  | 30.63%   | Outside the cluster |

|                                               | GliT (disulfide oxidoreductase) |            |       |                |           |          |                     |
|-----------------------------------------------|---------------------------------|------------|-------|----------------|-----------|----------|---------------------|
|                                               | Locus tag                       | Accession  | Score | Query Coverage | E value   | Identity |                     |
| <i>Aspergillus fumigatus</i> Af293            | AFUA_6G09740                    | EAL88825   | 689   | 100%           | 0.0       | 100.00%  |                     |
| <i>Aspergillus fumigatus</i> A1163            | AFUB_075790                     | EDP49549   | 689   | 100%           | 0.0       | 100.00%  |                     |
| <i>Aspergillus fischerii</i> NRRL 181         | NFIA_055430                     | EAW16194   | 657   | 100%           | 0.0       | 94.61%   |                     |
| <i>Aspergillus lentulus</i> IFM 54703         | ALT_0501                        | GAQ03180   | 637   | 100%           | 0.0       | 91.62%   |                     |
| <i>Aspergillus novofumigatus</i> IBT 16806    | P174DRAFT_511158                | PKX95380   | 637   | 100%           | 0.0       | 91.92%   |                     |
| <i>Aspergillus udagawae</i> IFM 46973         | AUD_6980                        | GAO88020   | 649   | 100%           | 0.0       | 93.73%   |                     |
| <i>Aspergillus turcosus</i> HMR AF 1038       | CFD26_101248                    | RLL93865   | 630   | 100%           | 0.0       | 90.42%   |                     |
| <i>Aspergillus thermomutatus</i> HMR Af 39    | CDV56_103762                    | RHZ44678   | 612   | 100%           | 0.0       | 88.66%   |                     |
| <i>Penicillium flavigenum</i> IBT 14082       | PENFLA_c013G09054               | OQE22215   | 187   | 92%            | 1,00E-55  | 39.56%   |                     |
| <i>Penicillium expansum</i> MD-8              | PEX2_011730                     | KGO63384   | 187   | 92%            | 1,00E-55  | 39.56%   |                     |
| <i>Bipolaris vicotriai</i> FI3                | COCVIDRAFT_11166                | EUN32652   | 213   | 94%            | 9,00E-66  | 39.51%   |                     |
| <i>Elsinoe ampelina</i> CECT 20119            | BDZ85DRAFT_276447               | KAF2219167 | 189   | 94%            | 2,00E-56  | 40.25%   |                     |
| <i>Coleophoma cylindrospora</i> BP6252        | BP6252_07502                    | RDW70939   | 343   | 93%            | 8,00E-117 | 57.96%   |                     |
| <i>Colletotrichum fructicola</i> CGMCC3.17371 | CGMCC3_g11499                   | KAE9572552 | 333   | 93%            | 7,00E-113 | 52.72%   |                     |
| <i>Colletotrichum asianum</i> ICMP 18580      | GQ607_015030                    | KAF0317720 | 315   | 96%            | 5,00E-106 | 49.23%   | Outside the cluster |
| <i>Trichoderma virens</i> Gv29-8              | TRIV-IDRAFT_138628              | EHK22124   | 327   | 86%            | 1,00E-110 | 58.08%   | Outside the cluster |
| <i>Torrubiella hemipterigena</i> BCC 1449     | VHEMI02400                      | CEJ82329   | 193   | 92%            | 4,00E-58  | 39.94%   |                     |
| <i>Penicillium zonata</i> CBS 506.65          | ASPZO-DRAFT_68844               | OJJ45951   | 215   | 87%            | 8,00E-67  | 40.14%   |                     |
| <i>Trichoderma reesei</i> RUT C-30            | M419DRAFT_103366                | ETR98482   | 169   | 92%            | 1,00E-48  | 35.85%   | Outside the cluster |
| <i>Rhizodiscina lignyota</i> CBS 133067       | NA57DRAFT_49625                 | KAF2102377 | 190   | 92%            | 9,00E-57  | 38.46%   | Outside the cluster |
| <i>Trichoderma reesei</i> QM6a                | TRIREDRAFT_74278                | EGR52478   | 169   | 92%            | 1,00E-48  | 35.85%   | Outside the cluster |
| <i>Trichoderma harzianum</i> TR274            | CI102_1871                      | PKK53428   | 159   | 93%            | 6,00E-45  | 34.57%   | Outside the cluster |
| <i>Trichoderma harzianum</i> CBS 226.95       | M431DRAFT_88869                 | PTB53001   | 159   | 93%            | 6,00E-45  | 34.57%   |                     |
| <i>Trichoderma parareesei</i> CBS 125925      | A9Z42_0047150                   | OTA04133   | 171   | 92%            | 3,00E-49  | 35.85%   |                     |

Table S1. Contains the best BLAST results for *A. fumigatus* Af293 GliZ, GliI, GliJ, GliP, GliC, GliM, GliG, GliK, GliA, GliN, GliF and GliT proteins. Entries are sorted by score although query coverage, identity and e-value are also shown.

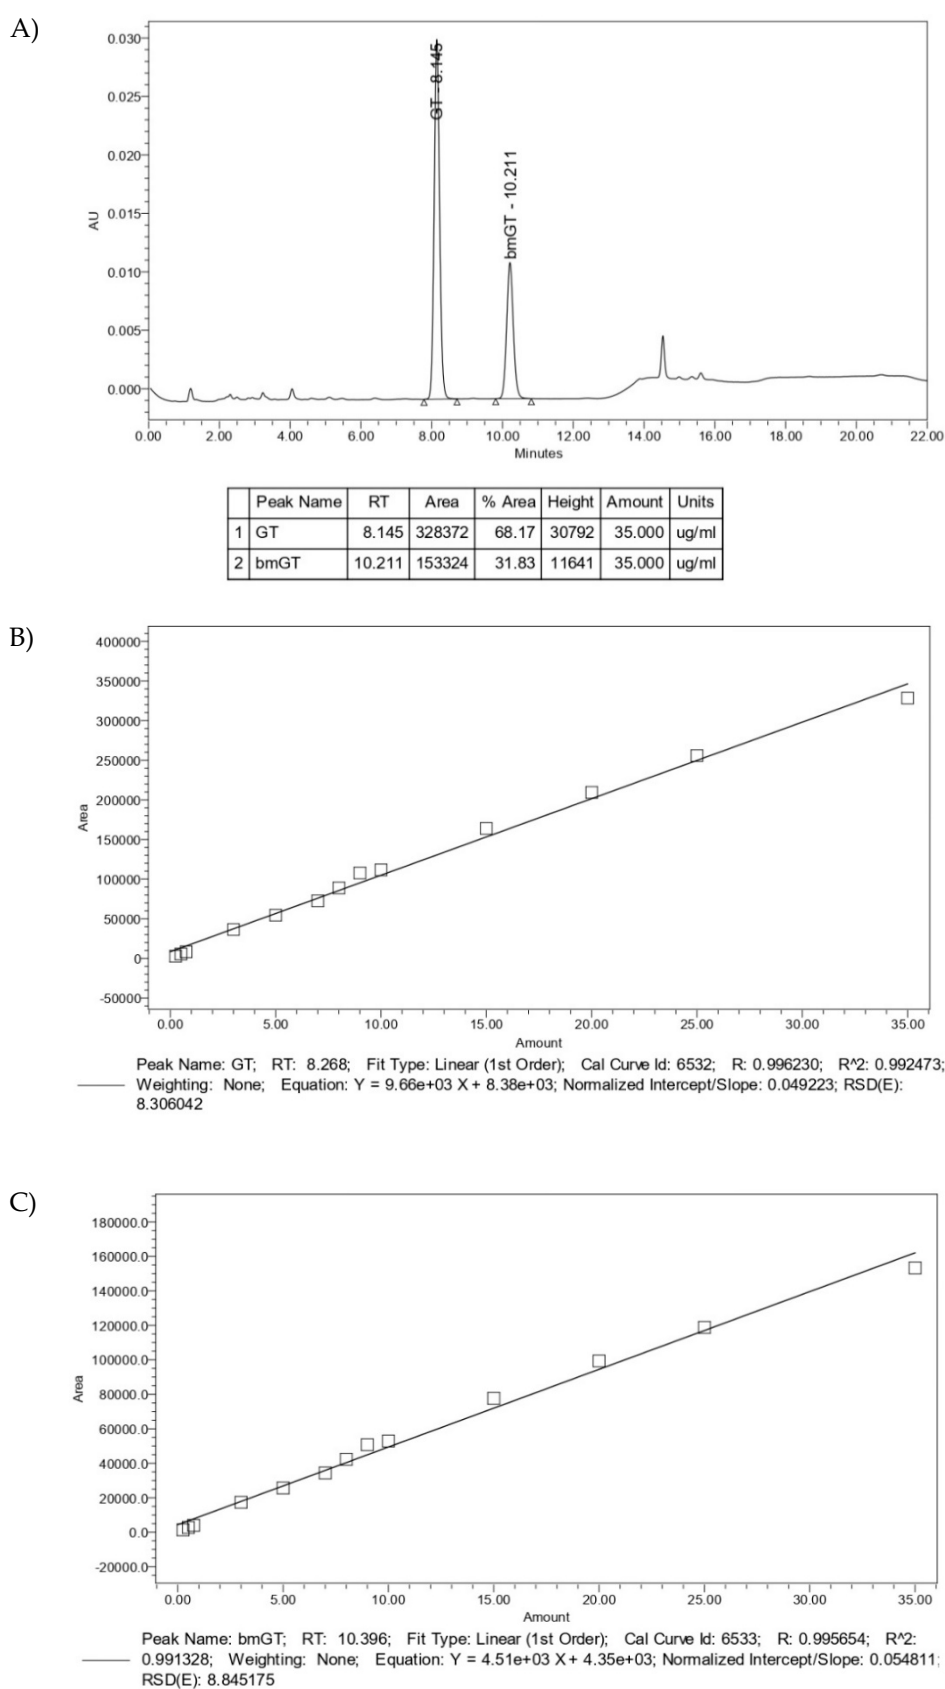

Figure S1. A) HPLC chromatogram of GT and bmGT standard. B) GT curve calibration. C) bmGT curve calibration.
